# Supplementary material for: Reseña de Klaus Zimmermann y Otto Zwartjes (coords.), Revista internacional de lingüística iberoamericana
Source: Royal Society of Chemistry journal article supplement (doi:10.1039/c5cp05766c), 2009-01-01
Supplement: c5cp05766c1.pdf [file c5cp05766c1.pdf]

Electronic Supplementary Information (ESI)

# **Rectangular Co<sub>3</sub>O<sub>4</sub> with Micro-/nanoarchitectures: Charge-driven PDDA-assisted Synthesis and Excellent Lithium Storage Performance**

*Bin Wang<sup>b</sup>, Yuanyuan Tang<sup>c</sup>, Xiao-ying Lu<sup>a</sup>, Sau Long Fung<sup>a</sup>, King Yan Wong<sup>a</sup>,*

*Wai Kuen Au<sup>a</sup> and Pengfei Wu<sup>c</sup>*

<sup>a</sup> Faculty of Science and Technology, Technological and Higher Education Institute of Hong Kong, Hong Kong, P.R. China. Email: xylu@vtc.edu.hk; Fax: +852-21761554; Tel: +852-21761453

<sup>b</sup> Hong Kong Applied Science and Technology Research Institute, Hong Kong, P.R. China. Email: hku507@gmail.com, bwang@astri.org; Fax: +852-34062802; Tel: +852-34062561

<sup>c</sup> School of Environmental Science and Engineering, South University of Science and Technology of China, Shenzhen, 518055, P.R. China. Email: tangyy@sustc.edu.cn; Tel: +86-755-88015460

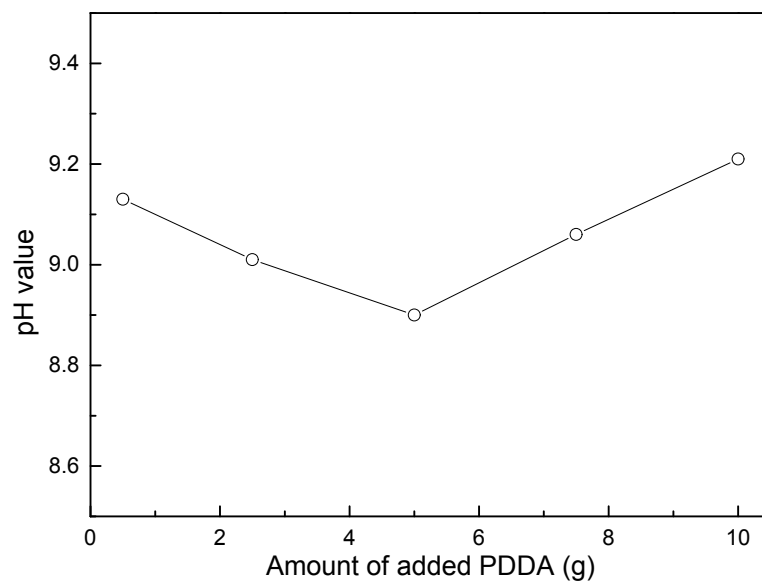

**Fig.S1** Effects of added PDDA on the final pH of the reactant solution after hydrothermal treatment

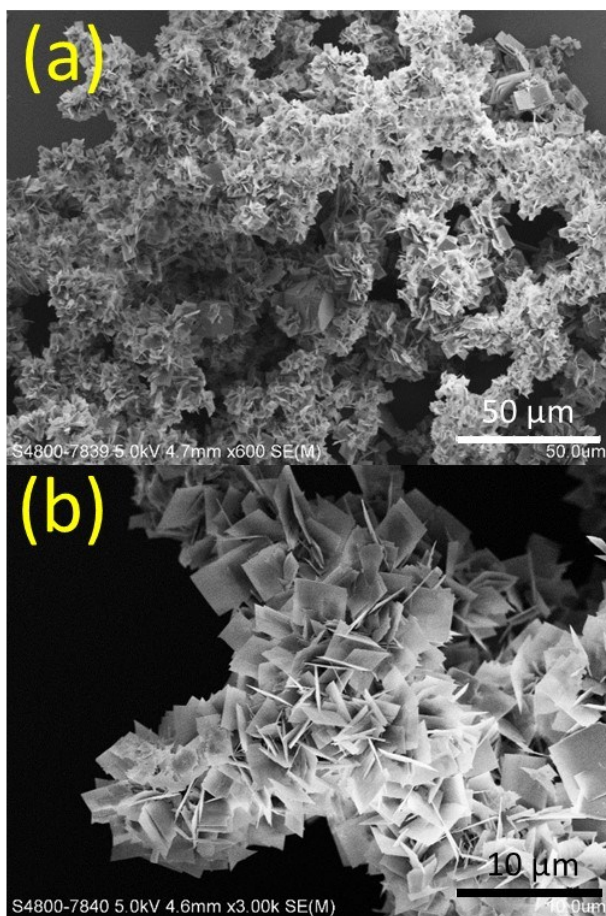

**Fig.S2** Typical FE-SEM images of the as-prepared  $\text{Co}_3\text{O}_4$  precursors with 1.25 g  $\text{Co}(\text{ac})_2$  + 3 g urea + 55 mL  $\text{H}_2\text{O}$  + 0.5 g PDDA (MW: 200~350K); (a) magnification:  $\times 600$ ; (b) magnification:  $\times 3000$ .

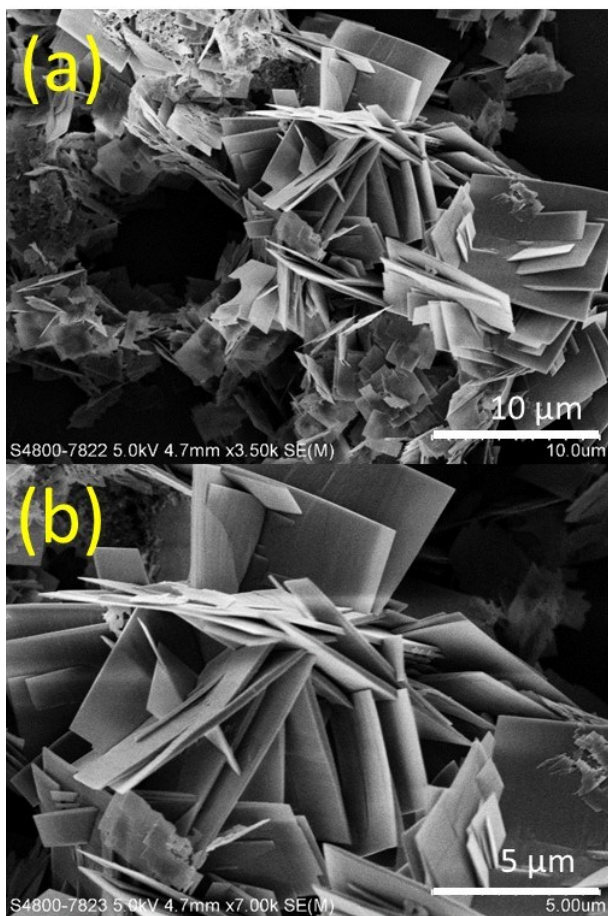

**Fig.S3** Typical FE-SEM images of the as-prepared  $\text{Co}_3\text{O}_4$  precursors with 1.25 g  $\text{Co}(\text{ac})_2$  + 3 g urea + 55 mL  $\text{H}_2\text{O}$  + 2.5 g PDDA(MW: 200-350K); (a) magnification:  $\times 3500$ ; (b) magnification:  $\times 7000$ .

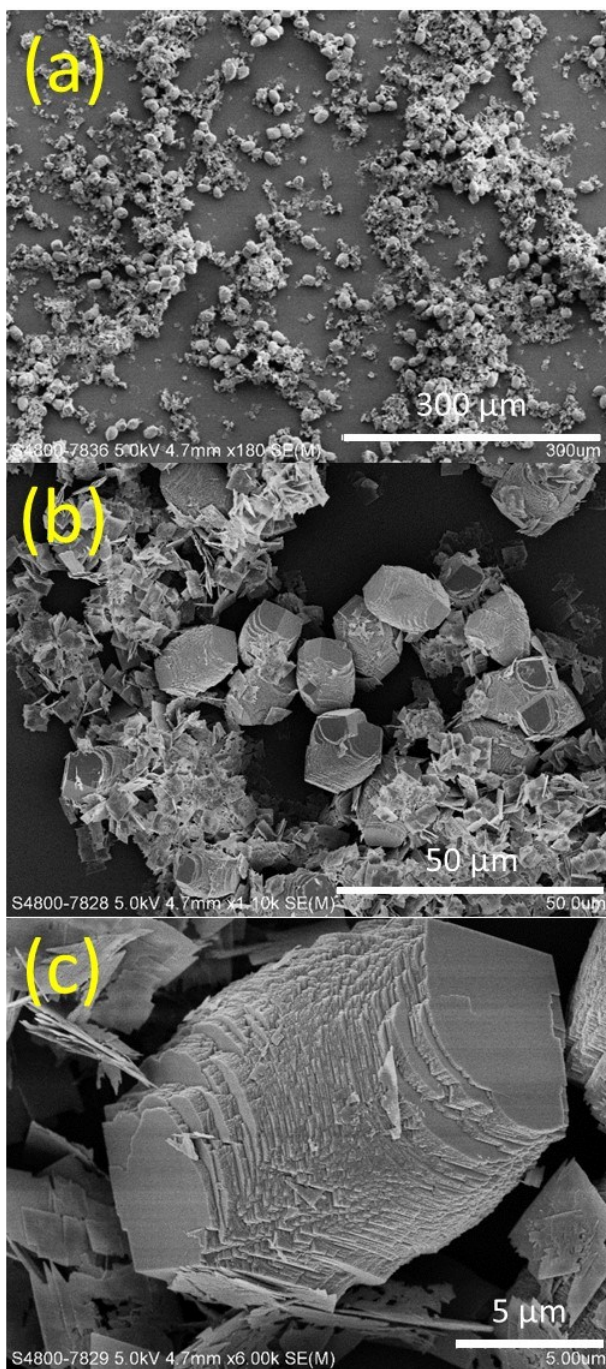

**Fig.S4** Typical FE-SEM images of the as-prepared  $\text{Co}_3\text{O}_4$  precursors with 1.25 g  $\text{Co}(\text{ac})_2$  + 3 g urea + 55 mL  $\text{H}_2\text{O}$  + 7.5 g PDDA (MW: 200~350K); (a) magnification:  $\times 180$ ; (b) magnification:  $\times 1100$ ; (c) magnification:  $\times 6000$ .



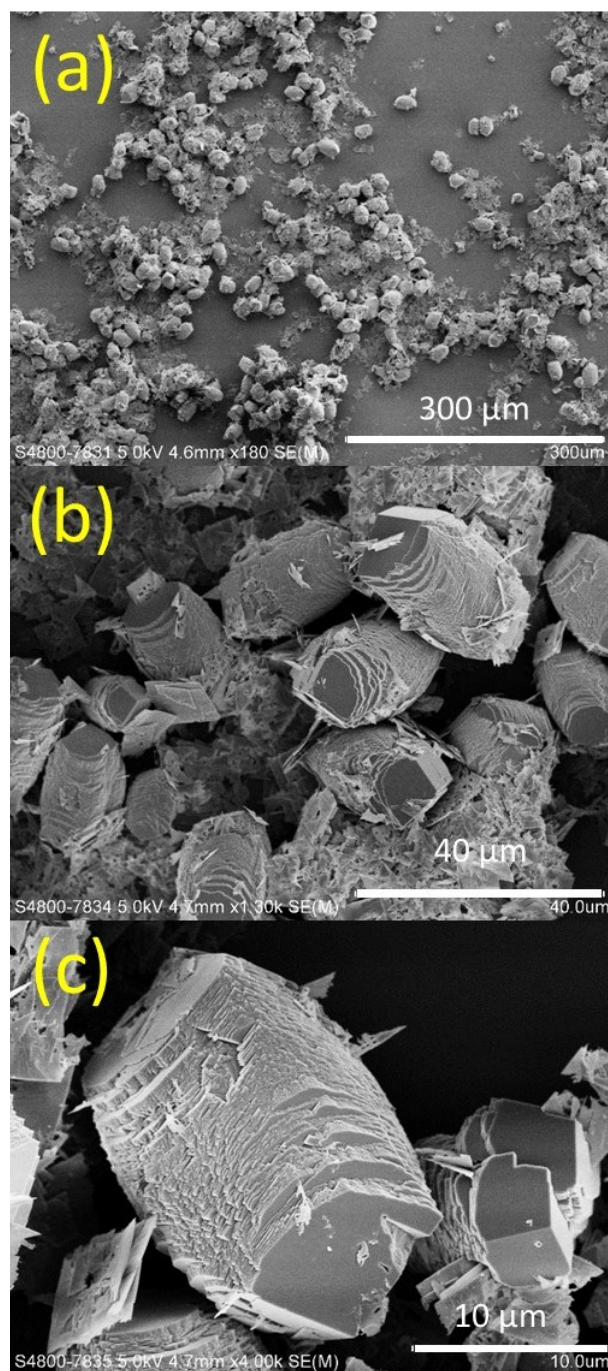

**Fig.S5** Typical FE-SEM images of the as-prepared  $\text{Co}_3\text{O}_4$  precursors with 1.25 g  $\text{Co}(\text{ac})_2$  + 3 g urea + 55 mL  $\text{H}_2\text{O}$  + 10 g PDDA (MW: 200~350K); (a) magnification:  $\times 180$ ; (b) magnification:  $\times 1300$ ; (c) magnification:  $\times 4000$ .

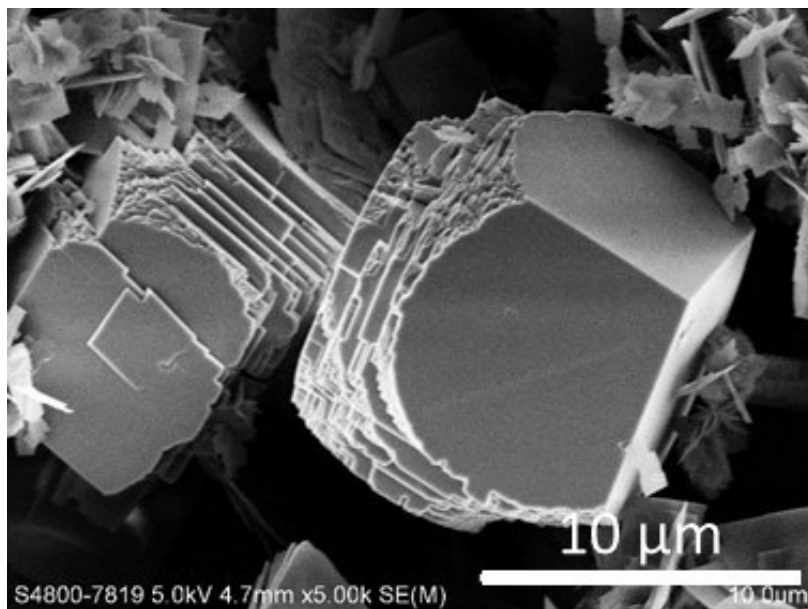

**Fig.S6** Typical FE-SEM images of the as-prepared Co<sub>3</sub>O<sub>4</sub> precursors with 1.25 g Co(ac)<sub>2</sub> + 3 g urea + 55 mL H<sub>2</sub>O; magnification: ×5000.

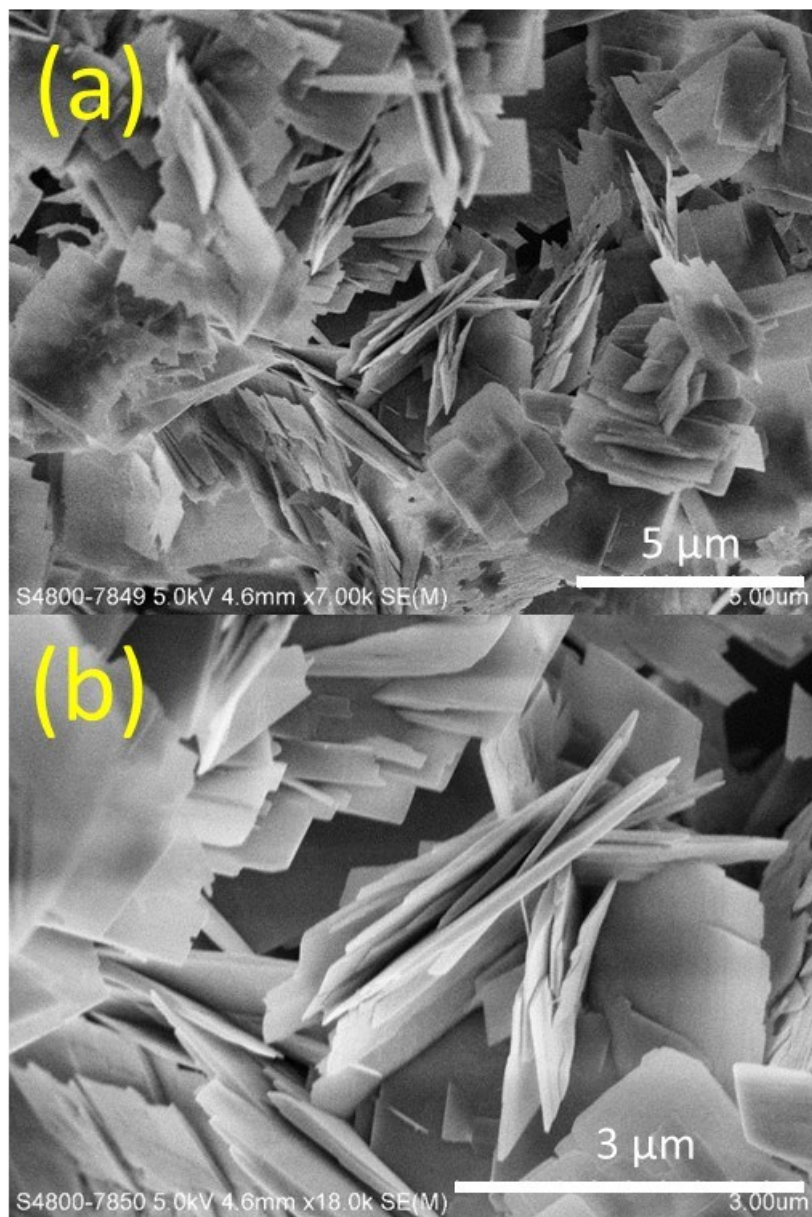

**Fig.S7** Typical FE-SEM images of the as-prepared  $\text{Co}_3\text{O}_4$  precursors with 1.25 g  $\text{Co}(\text{ac})_2$  + 3 g urea + 55 mL  $\text{H}_2\text{O}$  + 5 g PDDA (MW: 400-500 K); (a) magnification:  $\times 7000$ ; (b) magnification:  $\times 18000$ .



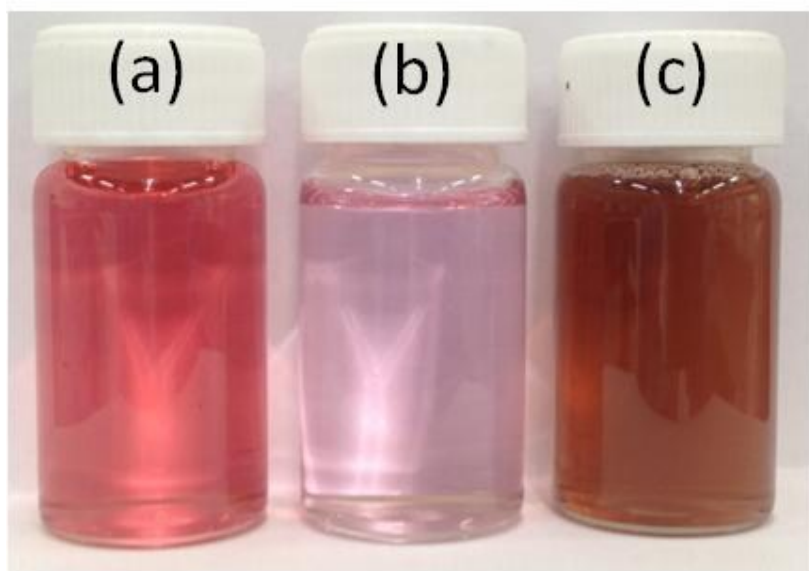

**Fig. S8** Digital photos of typical hydrothermal reaction solutions (a) reaction solution having 1.25 g  $\text{Co}(\text{ac})_2$ , 3 g urea and 5 g PDDA solution before hydrothermal treatment. The pink colour is from cobalt acetate used in the material synthesis; (b) reactant solution with the presence of 3 g urea after hydrothermal treatment. The light pink colour is due to the low concentration of cobalt ions; (c) reactant solution without the presence of urea after hydrothermal treatment. The obvious red colour is from cobalt ions, indicating that cobalt ions could not be precipitated if no urea was added in hydrothermal synthesis.

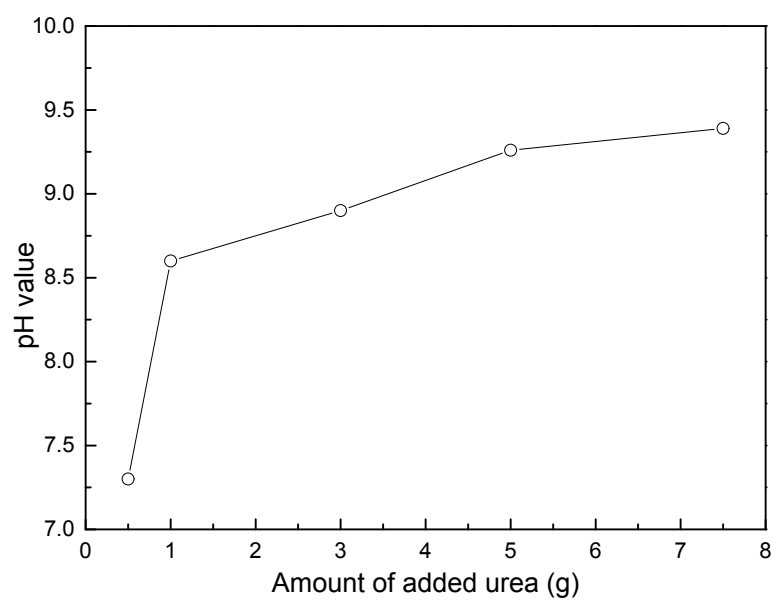

**Fig.S9** Effects of added urea on the final pH of the reactant solution after hydrothermal treatment

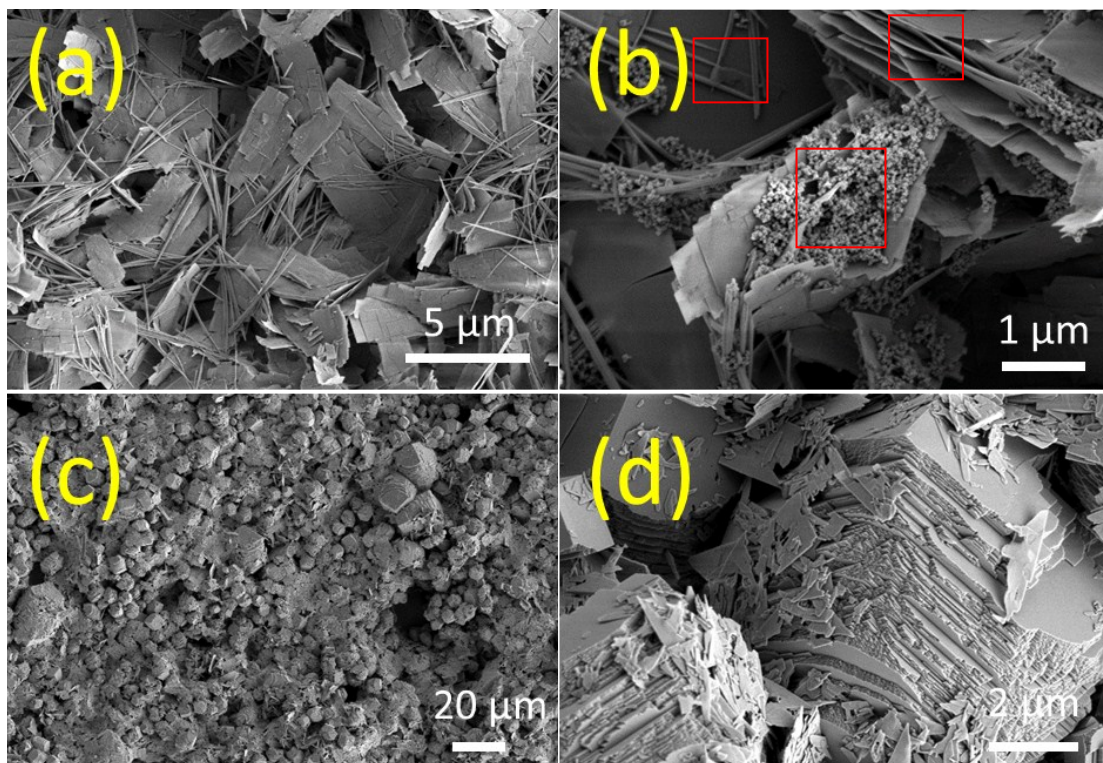

**Fig S10** Typical FE-SEM images of  $\text{Co}_3\text{O}_4$  precursors synthesized with 1.25 g  $\text{Co}(\text{ac})_2$ , 5 g PDDA and different amounts of urea (a,b) 0.5 g urea, small nanoparticles, one dimensional nano-needles and two dimensional sheet-like structures can be found in the images; (c,d) 7.5 g urea, micron-sized materials with lamellar structure can be found in the images

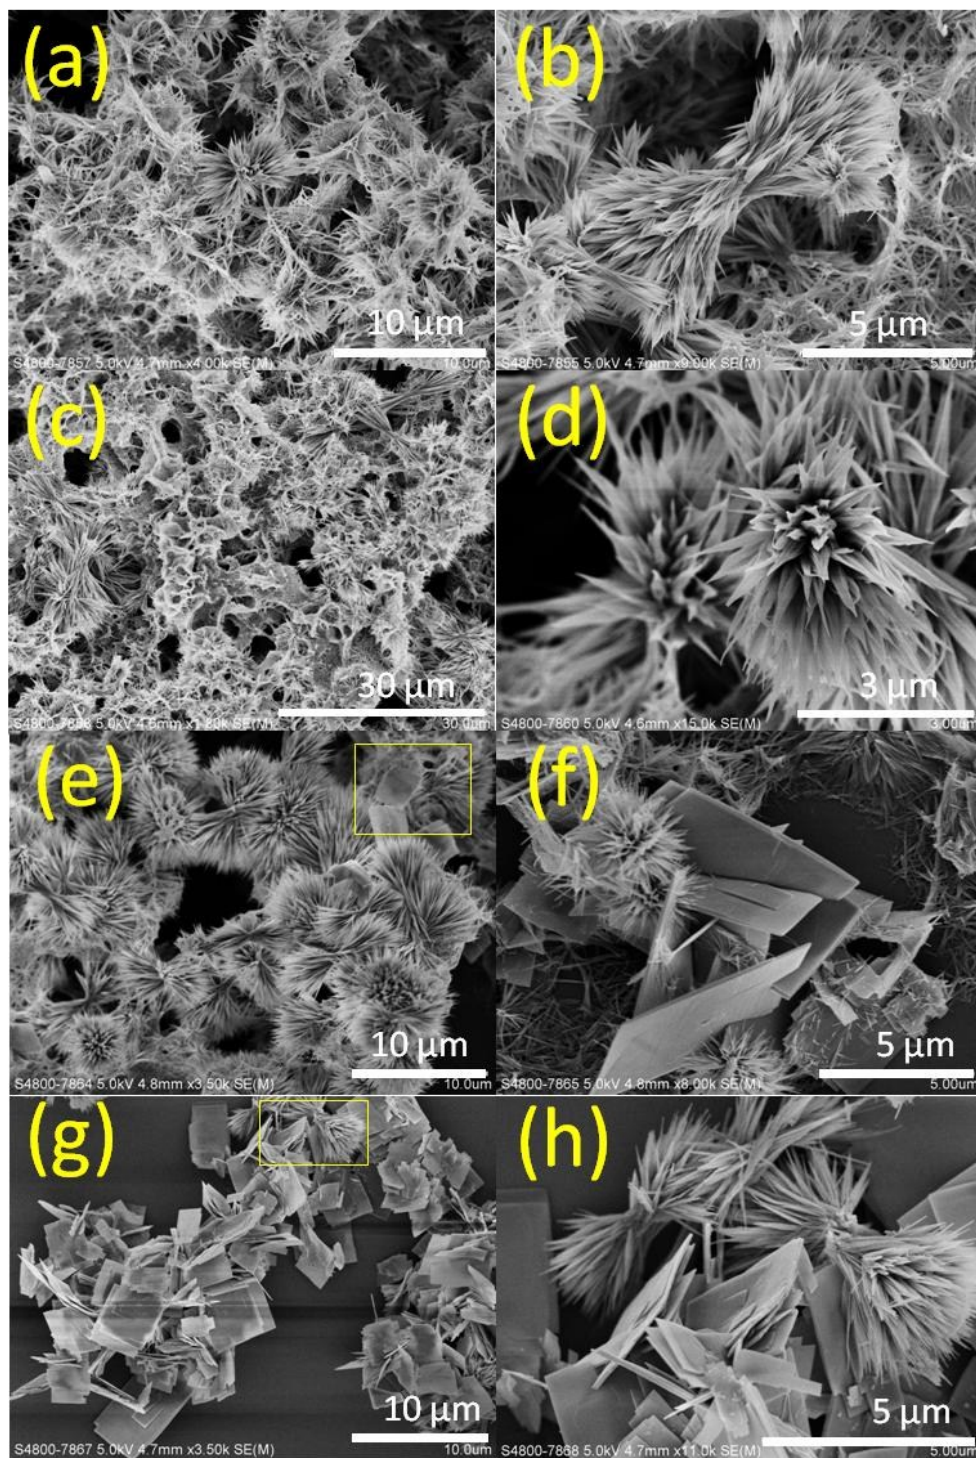

**Fig. S11** Typical FE-SEM images of the as-prepared  $\text{Co}_3\text{O}_4$  precursors (1.25 g  $\text{Co}(\text{ac})_2$ , 3 g urea and 5 g PDDA) collected at different hydrothermal stages (a,b) 1 hour; (c,d) 2 hours; (e,f) 4 hours; (g,h) 8 hours



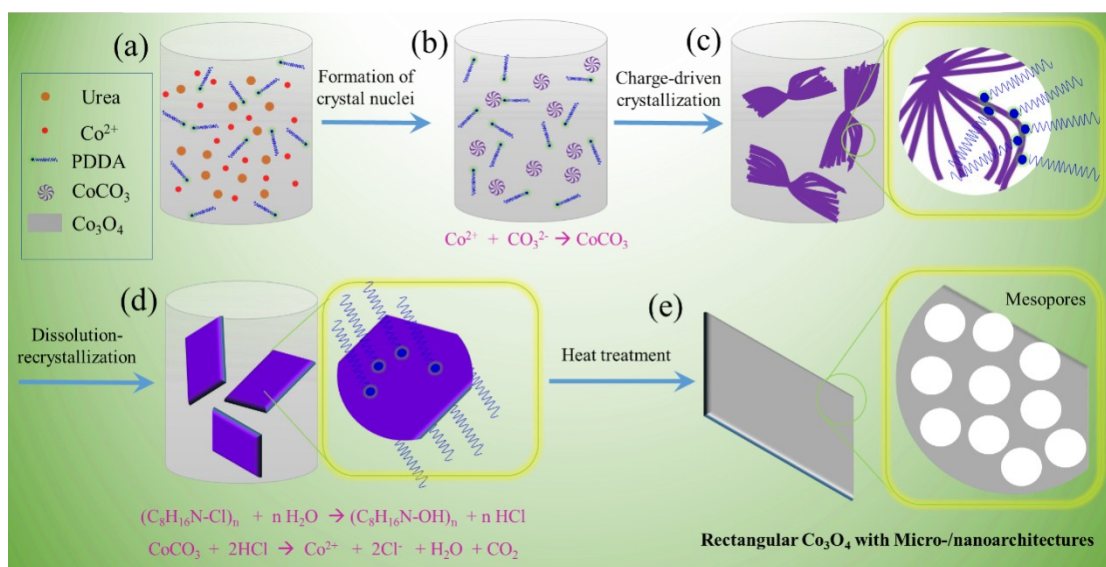

**Fig.S12** Schematic illustration of the formation of rectangular  $\text{Co}_3\text{O}_4$  with micro-/nanoarchitectures by charge-drive crystallization-dissolution-recrystallization mechanism. Note: The dissolution of  $\text{CoCO}_3$  precursors is due to the presence of  $\text{HCl}$  released from hydrolysis of PDDA



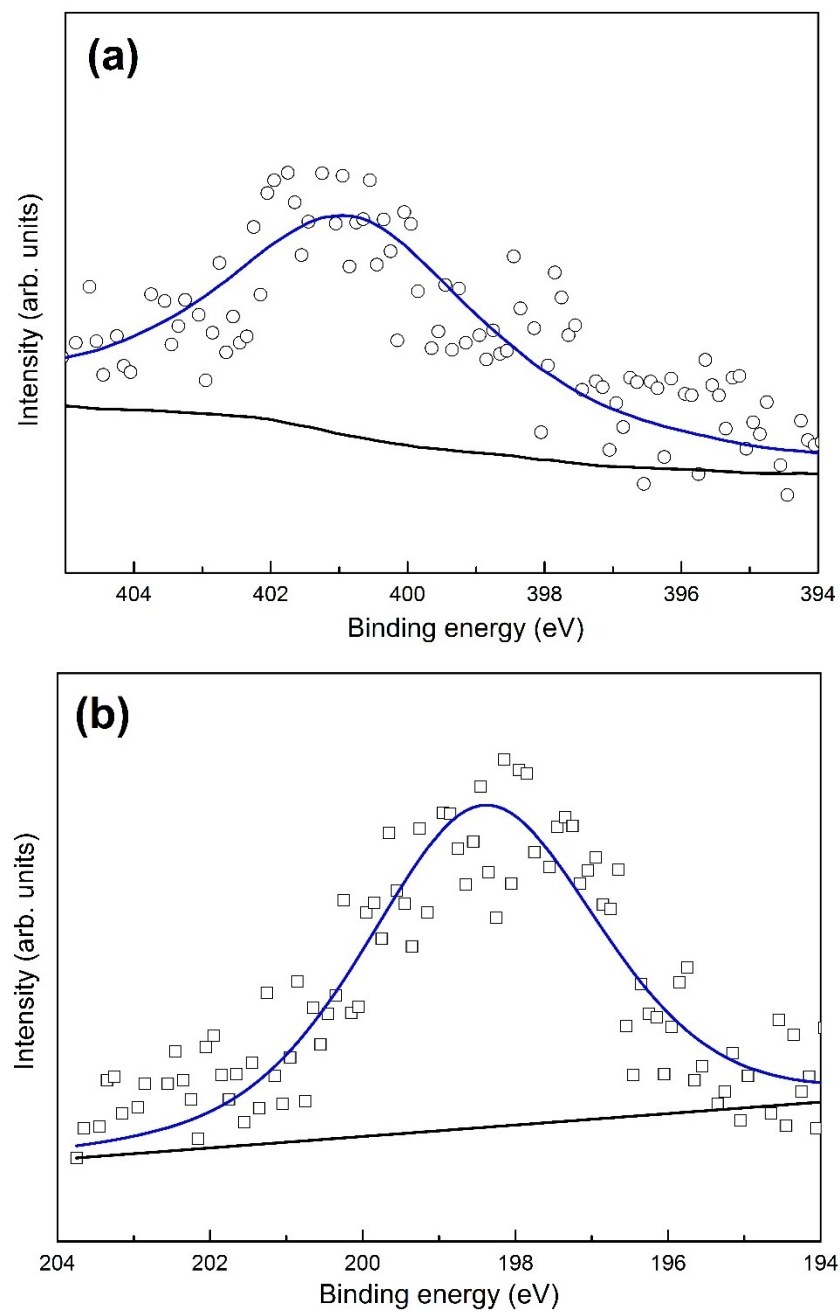

**Fig.S13** XPS high resolution spectra of the as-prepared  $\text{Co}_3\text{O}_4$  precursors (a) N 1s; (b) Cl 2p.

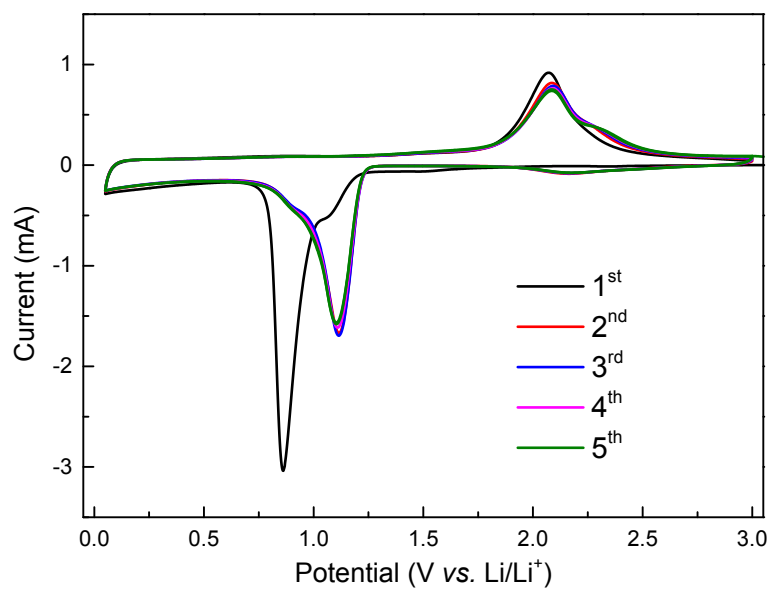

**Fig. S14** Typical cyclic voltammetry curves for the first 5 cycles of  $\text{Co}_3\text{O}_4$  sample (FST-1) tested with a scan rate of  $0.1 \text{ mV} \cdot \text{sec}^{-1}$  at room temperature

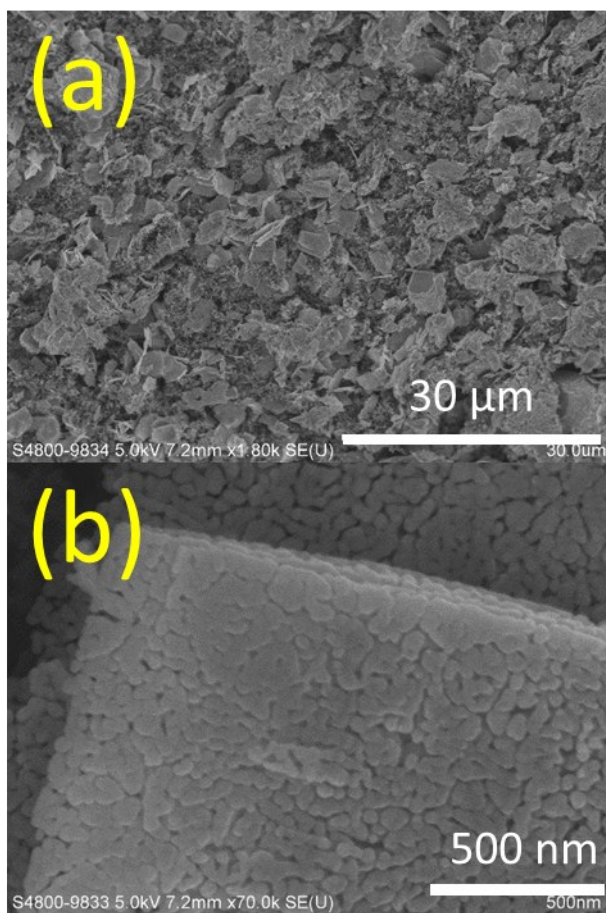

**Fig.S15** FE-SEM images of FST-1  $\text{Co}_3\text{O}_4$  electrode after evaluation at a current density of 500  $\text{mA g}^{-1}$  for 100 cycles

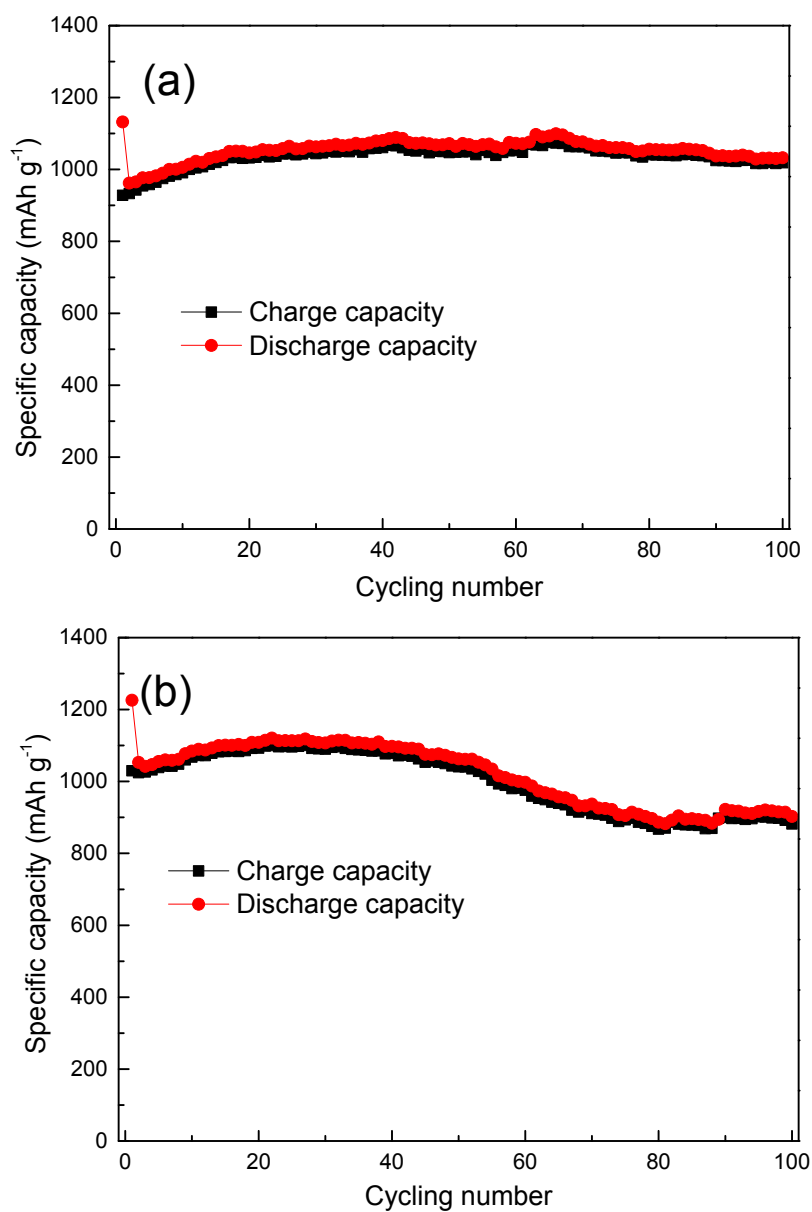

**Fig. S16** Battery cycling performances of reference  $\text{Co}_3\text{O}_4$  electrodes tested at a current density of  $500 \text{ mA g}^{-1}$  for 100 cycles (a)  $\text{Co}_3\text{O}_4$  electrode materials synthesized with 2.5 g PDDA (MW: 200-350K); (b)  $\text{Co}_3\text{O}_4$  electrode materials synthesized with 5.0 g PDDA (higher MW: 400-500K)

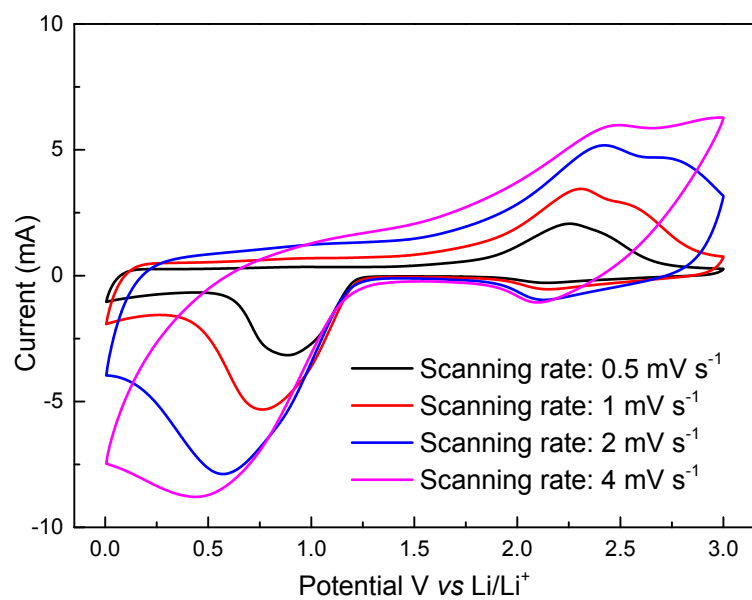

**Fig. S17** Typical CV curves of  $\text{Co}_3\text{O}_4$  electrode (FST-2) tested at scanning rates ranging from 0.5 to 4  $\text{mV S}^{-1}$



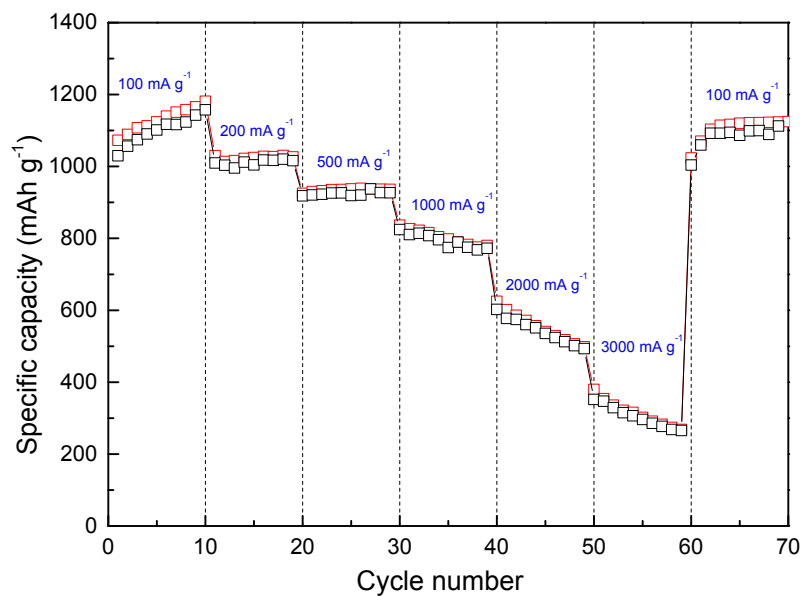

**Fig. S18** Rate capability performance of FST-2 tested at different current densities ranging from 100 mA g<sup>-1</sup> to 3000 mA g<sup>-1</sup>

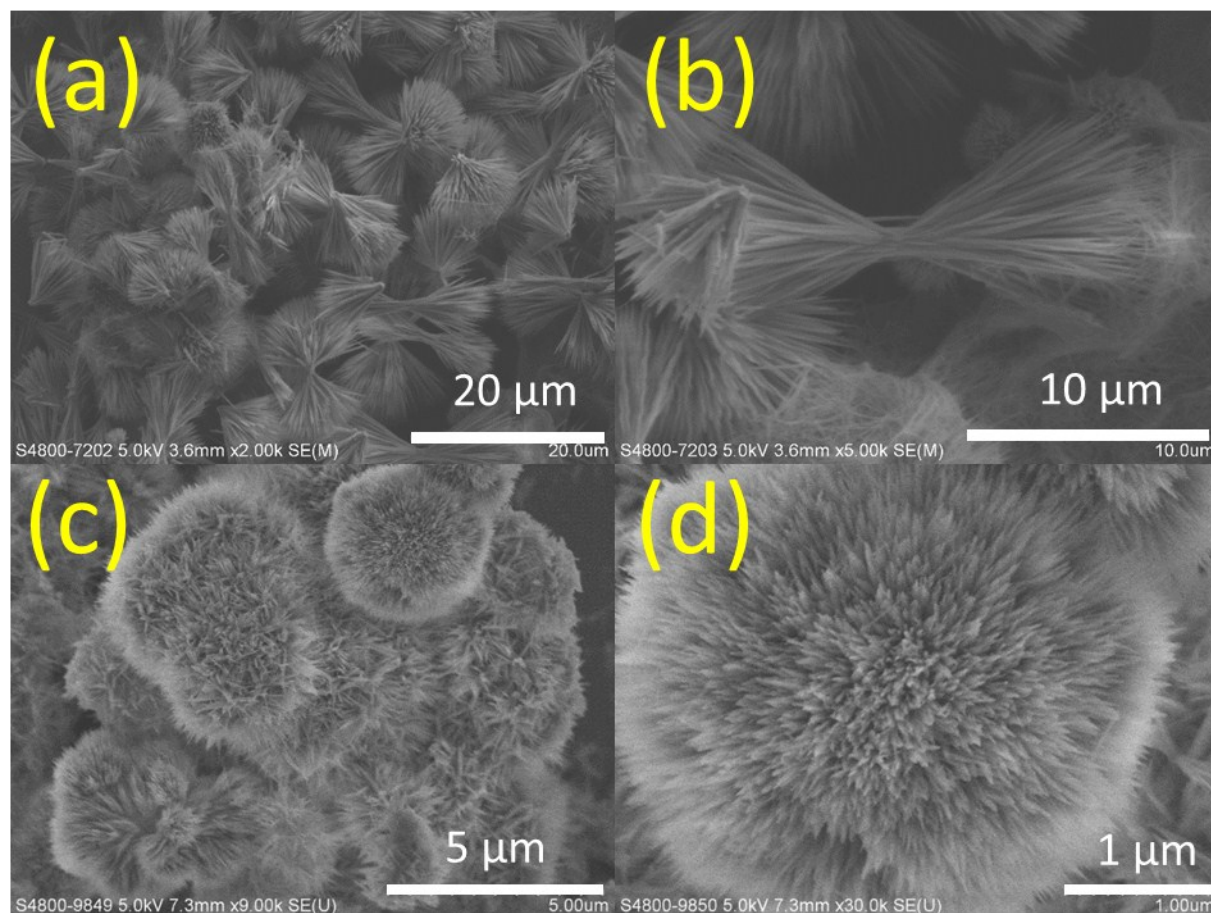

**Fig. S19** Typical FE-SEM images of metal oxide precursors synthesized by polyelectrolyte-assisted hydrothermal method (a, b) PDDA-assisted synthesis of  $\text{Co}_3\text{O}_4$  precursors with a hydrothermal duration of 2 hours and reduced concentration; (c, d) PBBU-assisted synthesis of  $\text{NiCo}_2\text{O}_4$  precursors with a hydrothermal duration of 12 hours.
